# Supplementary material for: Ovarian aging increases small extracellular vesicle CD81+ release in human follicular fluid and influences miRNA profiles
Source: publisher site journal article supplement (doi:10.18632/aging.103441), 2020-06-17
Supplement: Supplementary file [file aging-v12i12-103441-supplementary-material-SD1.pdf]

**SUPPLEMENTARY FIGURE**

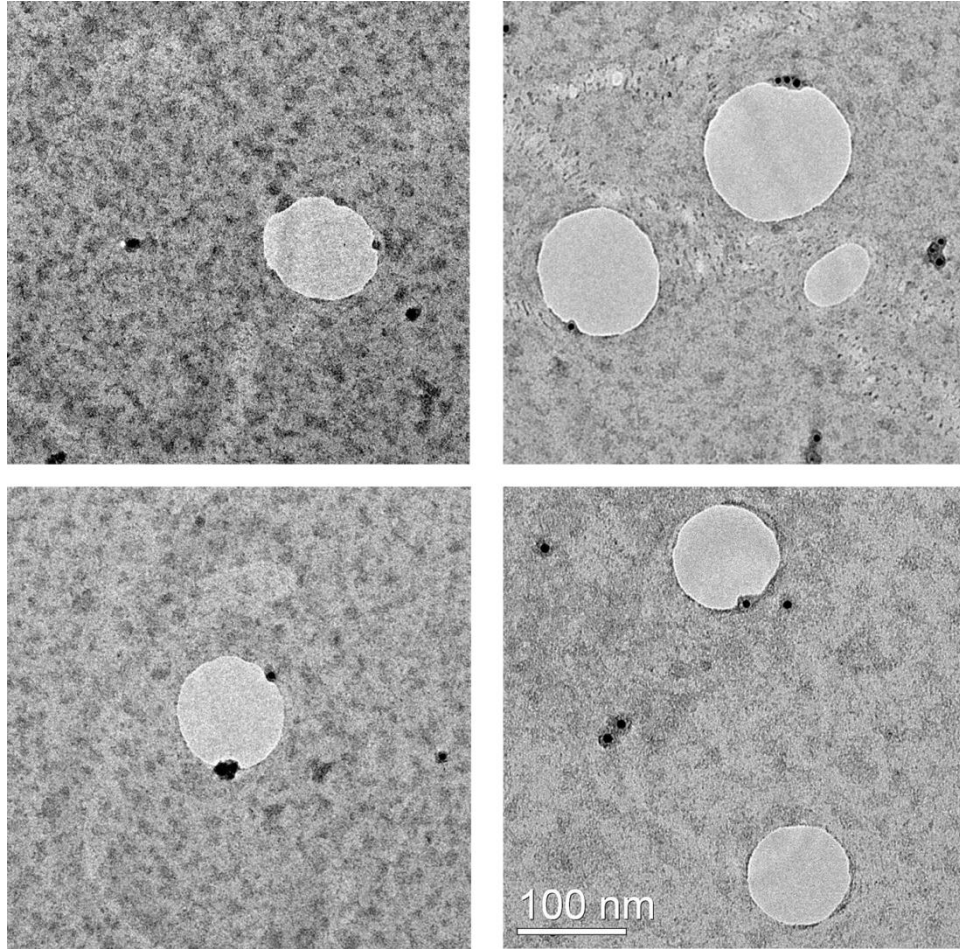

**Supplementary Figure 1. TEM micrographs showing small Gold (Au) nanoparticles functionalized with an antibody specific for the CD81 protein marker binding to the membrane of small EVs from the FF of younger women.**
